# Supplementary material
Source: publisher figshare collection journal article supplement (https://sage.figshare.com/ndownloader/files/23881948)
Supplement: Supplementary file 1 [file 23881948]

**ASSESSMENT FOR EFFECTIVE INTERVENTION SUPPLEMENTAL FILE**

**Table S2.** Item Difficulty Parameters and Their Standard Errors for the MIA Items

**ARTICLE TITLE**: Development and Validation of the Minnesota Inference Assessment

| Module | Item | *b* | *S.E.* |  | Module | Item | *b* | *S.E.* |
| --- | --- | --- | --- | --- | --- | --- | --- | --- |
| Apples | 1 | -0.930 | 0.130 |  | Glasses | 1 | 0.544 | 0.148 |
| Apples | 2 | 0.513 | 0.147 |  | Glasses | 2 | -0.044 | 0.134 |
| Apples | 3 | -0.778 | 0.130 |  | Glasses | 3 | -0.221 | 0.132 |
| Apples | 4 | -0.304 | 0.132 |  | Glasses | 4 | -0.444 | 0.130 |
| Apples | 5 | -0.930 | 0.130 |  | Glasses | 5 | 0.335 | 0.142 |
| Apples | 6 | -0.321 | 0.131 |  | Glasses | 6 | 0.159 | 0.138 |
| Apples | 7 | -1.512 | 0.137 |  | Glasses | 7 | 1.056 | 0.166 |
| Apples | 8 | 0.647 | 0.151 |  | Glasses | 8 | 0.725 | 0.153 |
| Apples | 9 | -1.347 | 0.134 |  | Glasses | 9 | 0.236 | 0.140 |
| Apples | 10 | 0.346 | 0.143 |  | Glasses | 10 | -1.081 | 0.131 |
| Apples | 11 | 0.265 | 0.141 |  | Glasses | 11 | 0.084 | 0.136 |
| Apples | 12 | -1.083 | 0.131 |  | Glasses | 12 | 0.523 | 0.147 |
| Apples | 13 | -0.458 | 0.130 |  | Glasses | 13 | -0.273 | 0.131 |
| Apples | 14 | -0.694 | 0.130 |  | Glasses | 14 | 0.047 | 0.136 |
| Apples | 15 | -1.205 | 0.132 |  | Glasses | 15 | 0.773 | 0.155 |
| Apples | 16 | 0.813 | 0.157 |  | Glasses | 16 | -1.506 | 0.136 |
| Cephalopods | 1 | 0.377 | 0.144 |  | Eagles | 1 | -0.110 | 0.134 |
| Cephalopods | 2 | 0.196 | 0.140 |  | Eagles | 2 | 0.535 | 0.148 |
| Cephalopods | 3 | 0.661 | 0.152 |  | Eagles | 3 | -0.128 | 0.134 |
| Cephalopods | 4 | -0.265 | 0.133 |  | Eagles | 4 | -0.234 | 0.132 |
| Cephalopods | 5 | 0.196 | 0.140 |  | Eagles | 5 | 0.130 | 0.138 |
| Cephalopods | 6 | -1.338 | 0.135 |  | Eagles | 6 | -0.181 | 0.133 |
| Cephalopods | 7 | 0.986 | 0.165 |  | Eagles | 7 | -0.694 | 0.130 |
| Cephalopods | 8 | 0.959 | 0.163 |  | Eagles | 8 | 0.285 | 0.141 |
| Cephalopods | 9 | 0.855 | 0.159 |  | Eagles | 9 | 0.428 | 0.145 |
| Cephalopods | 10 | 0.548 | 0.149 |  | Eagles | 10 | 0.149 | 0.138 |
| Cephalopods | 11 | 0.398 | 0.145 |  | Eagles | 11 | 0.305 | 0.142 |
| Cephalopods | 12 | -0.086 | 0.135 |  | Eagles | 12 | -1.746 | 0.143 |
| Cephalopods | 13 | 0.570 | 0.149 |  | Eagles | 13 | -0.559 | 0.130 |
| Cephalopods | 14 | 1.069 | 0.168 |  | Eagles | 14 | 0.428 | 0.145 |
| Cephalopods | 15 | 0.377 | 0.144 |  | Eagles | 15 | 0.305 | 0.142 |
| Cephalopods | 16 | 0.732 | 0.155 |  | Eagles | 16 | 0.914 | 0.161 |

*Note.* Apples: *Apple Thieves*; Glasses: *Granny’s Glasses*.
